# Supplementary material for: Physique and performance in male sitting volleyball players: implications for classification and training
Source: PeerJ. 2022 Oct 7;10:e14013. doi: 10.7717/peerj.14013 (PMC9549885; doi:10.7717/peerj.14013)
Supplement: Data S1 [file peerj-10-14013-s001.xlsx]

## Sheet: Foglio1
Age (years)	Body weigth (kg)	Standing heigth (cm)	Group (1 = able-bodied SV players); 2 = VS2 Class; 3 = VS1 Class)	Amount of training (hours per week)	SITH1 (cm)	SITH2 (cm)	Arm span (cm)	Shoulder-elbow length (cm)	Elbow-hand length (cm)	Hand span (cm)	Non-impaired leg length (cm)	Impaired leg length (cm)	Sub-total fat mass (%)	Arms fat mass (%)	Trunk fat mass (%)	Non-impaired leg fat mass (5)	Sit-ups test (nr)	Modified plank test (sec)	Seated chest pass test (m)	Handgrip strength test executed with the dominant hand (kg)	Handgrip strength test executed with the non-dominant hand (kg)	5m Forward Sprint Test (sec)	5m Backward Sprint Test (sec)	Modified Agility T-test (sec)	Speed and endurance test (sec)
37	85.4	177.4	1	3	90.4	139.6	183.2	36.1	47.6	37.7	106		28.4	24.8	31.35	23.96	53	174	5.2	43	43	2.86	2.48	12.41	38.08
28	79	187.2	1	4	94.5	147.5	194	40.1	50.6	42.5	113		17.38	19.19	17.03	18.9	49	122.14	4.8	35	35	3.77	2.74	14.72	36.09
45	85.4	181.9	1	4	92.8	137.1	173	36.3	45.8	57.5	112		20.72	16.86	23.96	16.86	62	60.5	5.35	41	43	2.72	2.41	11.07	29.6
37	97.8	182.9	1	6	92.9	143.8	197.8	40.3	50	42.1	113.1		25.82	22.56	29	22.57	51	147.87	5.37	42	38	2.77	2.1	10.39	25.72
56	83.1	184.4	1	4	97.5	146.9	197.3	38.3	50.5	43.9	107.9		11.03	11.37	11.5	9.89	38	180.31	4.8	40	42	2.83	2.78	12.53	29.97
20	55.4	171.4	1	2	88.9	135.8	179.9	35.1	46.6	43.5	100		8.81	7.69	9.72	7.48	54	100	4.87	32	38	2.43	1.8	9.35	24.22
45	77	178.2	1	2	93.1	143.3	187.2	37.7	47.1	41.1	103.4		30.44	29.29	31.35	28.83	35	89	4.07	54	48	2.43	1.58	10.34	23.34
20	71.4	179.3	1	2	87.5	141	187.5	37.1	49.2	49.9	104.6		9.84	11.23	9.69	9.84	52	150	5.3	64	58	2.37	1.57	7.96	20.56
25	83.2	171	2	6	90.1	136.7	174	34.4	44.9	52.5	111		34.43	42.68	29.11	40.24			4.36	31	41	3.09	2.45	13.58	31.8
31	62.6	169.3	2	1.5	85.8	131	172	34	45.6	37.7	98.5		17.94	14.98	20.42	14.87	43	170	4.2	36	40	2.96	2.42	12.42	31.18
40	94.2	190.4	2	2	96.4	144.4	190.2	38.2	50.2	47.5	115.2		22.36	23.4	23.02	20.17	30	88.63	4.95	56	54	3.03	2.28	12.42	27.26
39	88.2	189.9	2	4	98.3	153.2	202	42	51.7	46	112		19.73	19.98	21.42	17.39	38	132	6.1	51	51	3.17	2.71	12.63	27.4
35	112.8	186.5	2	6	95.6	174.9	192	39.7	48.8	46.3	112.2		36.64	30.86	40.4	30.41	40	88	5.14	50	42	2.6	2.27	10.95	25.97
40	106.6	189.8	2	4	98	153.5	194	40.1	51.8	50.4	113.1		29.87	23.1	35.91	20.59	40	70	6.05	58	66	2.9	2.23	11.12	24.79
52	77.9	175.9	2	6	88.6	137.9	186.2	37.6	48.5	44.8	100.8		19.05	29.86	17.36	18.45	38	200	4.6	45	40	2.19	2.02	10.59	23.94
52	76.3	186.5	2	6	97.8	148.6	189.1	39.4	49.5	53.1	107.2		16.63	18.29	16.1	18.07	46	123	5.3	45	39	2.34	1.85	10.13	21.48
45	76.4	171.8	3	6	91	128.3	177	34.9	47.1	41.7	112	64.5	30.48	28.86	33.55	24.54	31	80.64	4.5	32	42	2.49	2.82	12.19	30.26
41	99.2	182	3	4	92	143.7	189.2	39	49.9	45.5	116	55	29.93	30.18	31.71	25.16	25	41.42	5.1	42	40	3.98	3.11	14.49	35.66
31	89.9	180.3	3	5	91.8	147.1	193.1	39	49.2	46.1	118.1	77.2	30.52	36.28	30.66	27.88	38	76.73	4.5	42	44	2.67	2.47	12.33	30.14
24	64.6	178.4	3	5	95	146	185.6	39.1	48.7	40.4	108	69.9	16.23	25.17	13.69	19.05	53	161.55	4.9	58	52	1.85	1.87	8.71	22.98
30	78.6	169.4	3	2.5	88.6	138.9	180.3	35.9	48.7	56.8	97.5	61.7	24.78	23.9	27.11	22.67	26	116	5.8	48	46	2.06	1.95	10.23	26.42
41	103.5	180.3	3	4	94.4	144.7	192	38.5	50.3	50.2	109.1	78.2	33.4	40.32	34.51	29.12	30	49	5.32	58	68	2.98	3.09	12.88	31.91
31	102.6	182.2	3	4	95.4	144.5	192.2	39.3	50.8	48.3	108.5	79.3	24.25	27	24.01	26.14	35	77	6.58	54	60	2.5	2.07	10.67	23.54
29	77.1	185.7	3	3	97.3	147.9	196.3	39.5	49.6	41.7	105	67.7	18.19	26.27	15.18	22.53	41	158	5.4	40	46	2.11	1.89	9.48	21.19
26	132.6	195.6	3	6	94.7	157.7	206.5	42.8	53.3	49.6	116.2	81.1	35.95	36.19	37.82	31.98	41	33	6.8	68	65	2.64	2.85	12.04	27.85
33	95.3	197	3	8	99.7	157	201.2	42.8	53	59.9	121.1	82.2	22.23	29.27	20.32	25.85	46	62	6	52	52	1.9	1.87	9.95	22.21
54	104	189.8	3	5	95	150.2	199.2	42.4	53.5	39.4	114.2	67.5	26.84	26.32	28.27	23.56	30	61	4.7	39	38	2.84	3.14	13.36	32
54	83.2	189	3	4	96.1	147.9	193	38.5	51.1	44.3	111.6	67.1	27.08	30.25	27.53	27.26	41	67	4.5	37	34	2.9	3.01	12.54	27.56
20	68.6	167.1	3	5	89.9	134.2	175.5	36.1	45.9	41.9	95.5	34.5	34.32	44.85	35.83	29.06	26	149	4.5	35	32	2.65	2.85	13.77	37.88
33	83.6	188.9	3	4	99.5	151.3	176	40.6	50	44	108.2	40.7	23.73	35.4	22.81	24.86	36	120	5.73	58	52	3.19	2.82	13.36	27.49
23	88.9	174	3	3	92.4	141.8	178	33.8	47.1	39.8	105.2	41.1	36.48	40.82	38	33.64	29	18	4.48	48	45	2.92	3.78	15.61	40.22
53	79.5	166.4	3	2	87.6	135.1	176.5	37.1	45.8	40.1	95	43.3	29.38	36.7	31.93	22.13	39	80	4.3	42	30	2.51	2.87	12.07	25.42
49	99.1	187.9	3	5	101.4	146.1	189	40.3	48.7	47.1	109	37	31.06	40.34	33.74	24.14	48	83	6.1	51	52	2.82	2.85	12.32	29
46	84	182	2	4	94.8	143.4	184	38.3	49.2	39	107.7		29.6	29.45	32	28.6	33	56	3.78	40	32	3.36	2.93	17.51	43.07
43	89.4	181.1	1	5	91.7	140.9	185.3	36.8	51.2	39.3	104.4		21.9	19.35	22.7	22	36	149	4.78	50	42	2.9	2.48	12.38	26.84
				4.2
